# Supplementary material for: Emulgels Containing Propolis and Curcumin: The Effect of Type of Vegetable Oil, Poly(Acrylic Acid) and Bioactive Agent on Physicochemical Stability, Mechanical and Rheological Properties
Source: MDPI journal article supplement (doi:10.3390/gels7030120), 2021-08-12
Supplement: s1 [file s1]

## Supplementary Material

# Emulgels Containing Propolis and Curcumin: The Effect of Type of Vegetable Oil, Poly(Acrylic Acid) and Bioactive Agent on Physicochemical Stability, Mechanical and Rheological Properties

Rafaela Said dos Santos <sup>1</sup>, Jéssica Bassi da Silva <sup>1</sup>, Hélen Cássia Rosseto <sup>1</sup>, Camila Felix Vecchi <sup>1</sup>, Katieli da Silva Souza Campanholi <sup>2</sup>, Wilker Caetano <sup>2</sup> and Marcos Luciano Bruschi <sup>1,\*</sup>

<sup>1</sup> Postgraduate Program in Pharmaceutical Sciences, Laboratory of Research and Development of Drug Delivery Systems, Department of Pharmacy, State University of Maringa, Maringa, 87020-900, PR, Brazil; rafaelasaid@gmail.com (R.S.d.S.); jessicabassidasilva@gmail.com (J.B.d.S.); helenrosseto@gmail.com (H.C.R.); camilaf.vecchi@gmail.com (C.F.V.)

<sup>2</sup> Postgraduate Program in Chemistry, Department of Chemistry, Research Nucleus in Photodynamic Systems, State University of Maringa, Maringa, 87020-900, PR, Brazil; katieli\_souza@hotmail.com (K.d.S.S.C.); wcaetano@uem.br (W.C.)

\* Correspondence: mlbruschi@uem.br; Tel.: +55-44-3011-4870

**Table S1.** Mean globule size and polydispersity index (PI) of dispersed phase of the emulgels containing PF or AN oils just after the preparation (T<sub>0</sub>) and after 12 days (T<sub>12</sub>) of the ice-thawing cycle.

| Formulations | Mean size (µm) |                 | PI             |                 |
|--------------|----------------|-----------------|----------------|-----------------|
|              | T <sub>0</sub> | T <sub>12</sub> | T <sub>0</sub> | T <sub>12</sub> |
| F1           | 32.13 ± 13.29  | 29.75 ± 11.89   | 0.6            | 0.6             |
| F2           | 25.03 ± 13.01  | 27.63 ± 10.03   | 0.5            | 0.5             |
| F3           | 27.11 ± 8.36   | 33.37 ± 12.66   | 0.4            | 0.5             |
| F7           | 34.04 ± 11.25  | 37.67 ± 19.05   | 0.5            | 0.6             |
| F8           | 27.28 ± 9.02   | 28.86 ± 9.77    | 0.5            | 0.5             |
| F9           | 26.94 ± 10.71  | 25.13 ± 6.74    | 0.6            | 0.4             |
| F10          | 43.49 ± 16.83  | 57.45 ± 40.99   | 0.6            | 1.2             |
| F11          | 37.16 ± 16.10  | 46.92 ± 38.24   | 0.7            | 0.9             |
| F12          | 36.45 ± 13.73  | 46.84 ± 48.19   | 0.6            | 1.0             |
| F16          | 39.02 ± 15.75  | 54.34 ± 31.86   | 0.7            | 0.9             |
| F17          | 38.20 ± 16.08  | 52.46 ± 36.71   | 0.7            | 0.4             |
| F18          | 40.83 ± 16.80  | 47.78 ± 29.01   | 0.7            | 0.8             |
| F19          | 39.84 ± 14.51  | 27.91 ± 9.99    | 0.6            | 0.4             |
| F20          | 30.93 ± 10.73  | 32.40 ± 12.29   | 0.5            | 0.5             |
| F21          | 32.35 ± 11.18  | 24.62 ± 8.40    | 0.5            | 0.4             |
| F25          | 34.24 ± 10.65  | 34.99 ± 12.30   | 0.5            | 0.5             |
| F26          | 28.39 ± 8.00   | 31.10 ± 8.95    | 0.4            | 0.4             |
| F27          | 29.90 ± 8.91   | 30.68 ± 9.81    | 0.4            | 0.5             |

\*± Standard deviation.

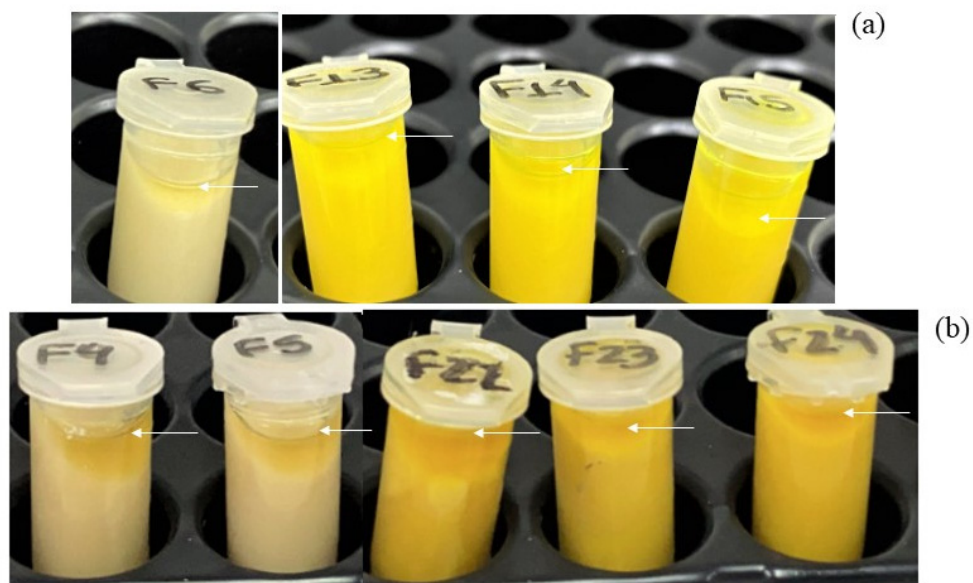

**Figure S1.** Phase separation of the systems during the physicochemical stability analysis at time zero (a): F6, F13, F14, F15; and after 12 days (b): F4, F5, F22, F23, and F24.

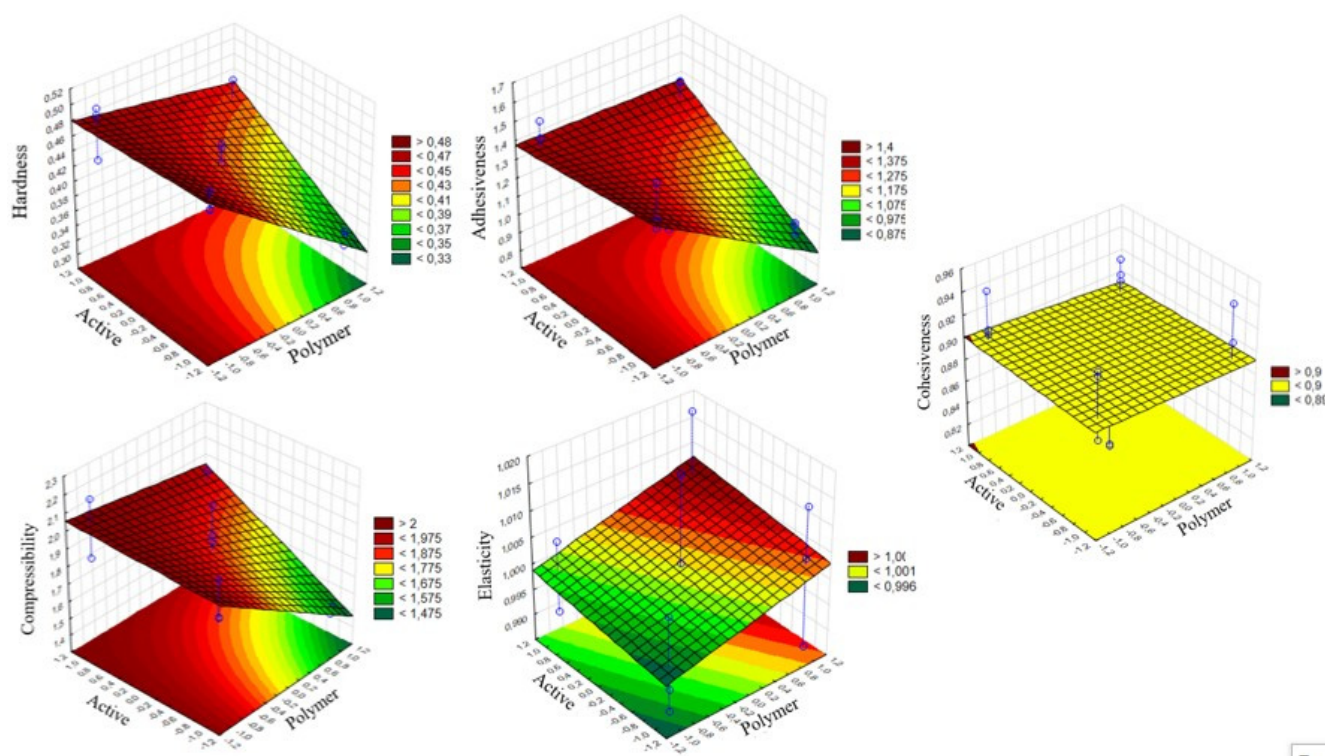

**Figure S2.** Response surface plots of mechanical properties (hardness, compressibility, adhesiveness, elasticity and cohesiveness) of PF emulgels influenced by different polymers (C934P, C974P, PC), different type of bioactive (PE, CUR, PE+CUR) at 25 °C. The color scale is indicated in each figure and shows the isoparametric values.

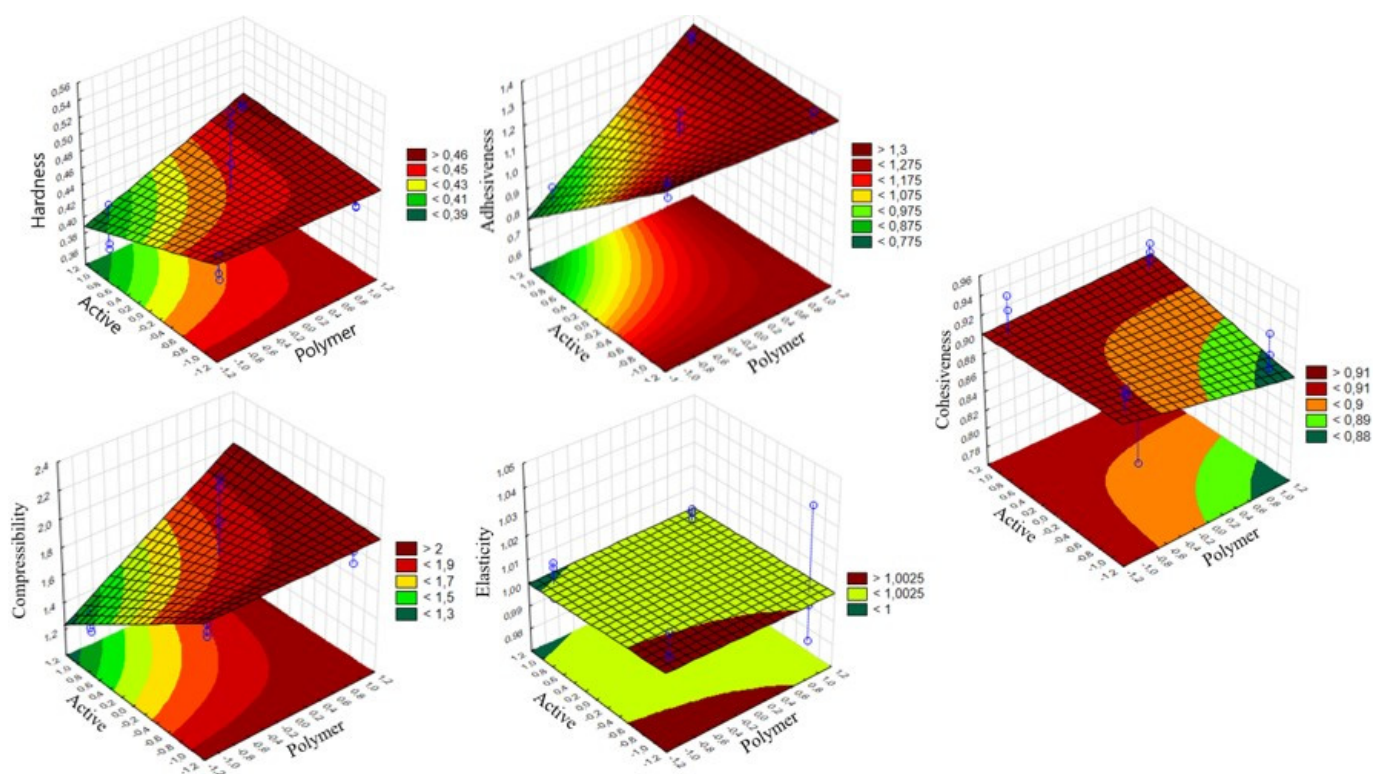

**Figure S3.** Response surface plots of mechanical properties (hardness, compressibility, adhesiveness, elasticity and cohesiveness) of PF emulgels influenced by different polymers (C934P, C974P, PC), different type of bioactive (PE, CUR, PE+CUR) at 34 °C. The color scale is indicated in each figure and shows the isoparametric values.

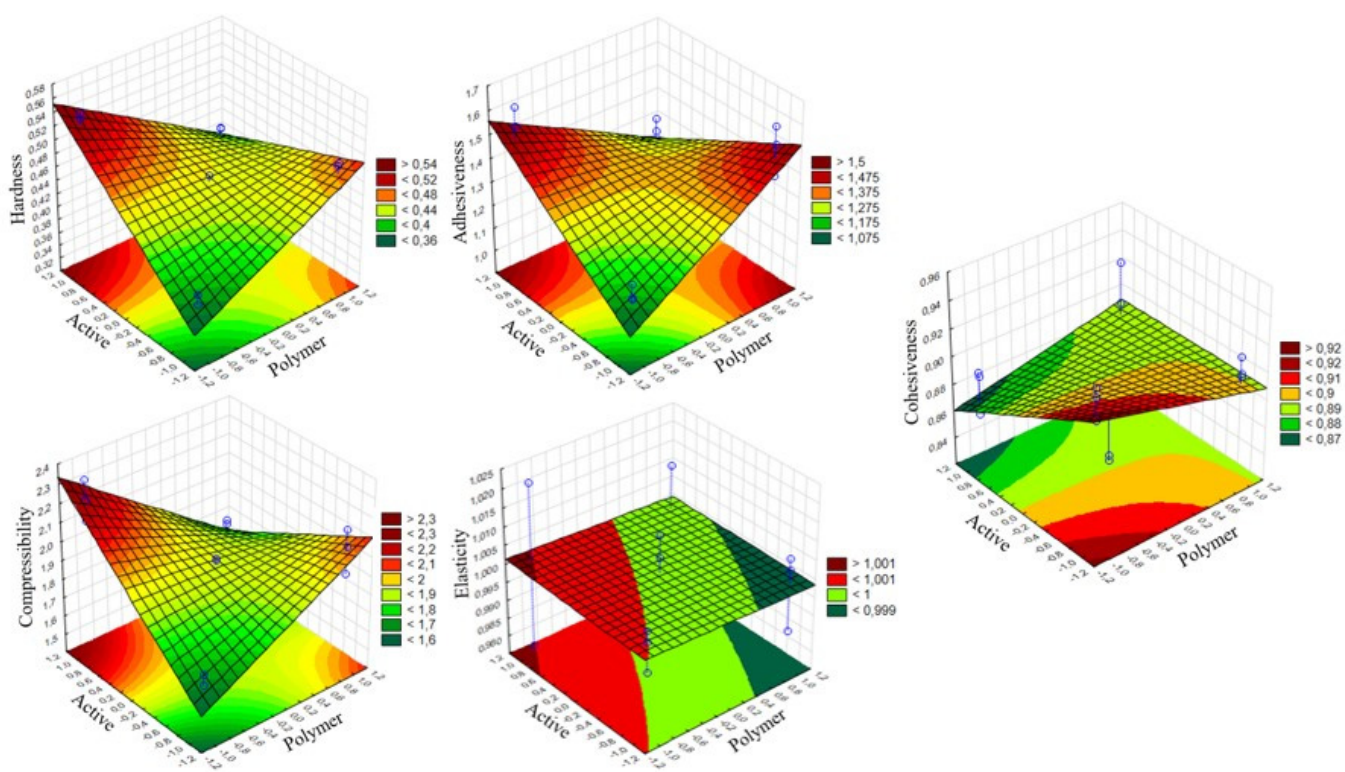

**Figure S4.** Response surface plots of mechanical properties (hardness, compressibility, adhesiveness, elasticity and cohesiveness) of AN emulgels influenced by different polymers (C934P, C974P, PC), different type of bioactive (PE, CUR, PE+CUR) at 25 °C. The color scale is indicated in each figure and shows the isoparametric values.



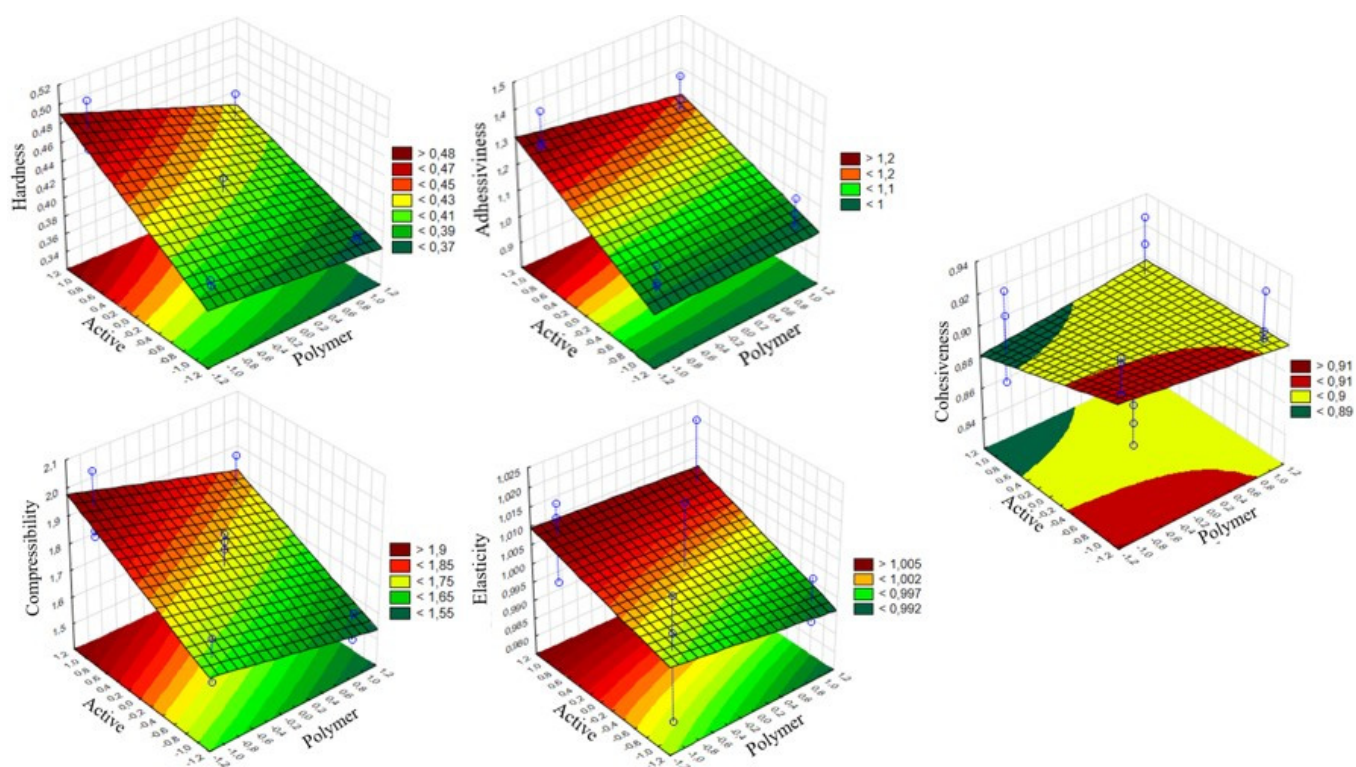

**Figure S5.** Response surface plots of mechanical properties (hardness, compressibility, adhesiveness, elasticity and cohesiveness) of AN emulgels influenced by different polymers (C934P, C974P, PC), different type of bioactive (PE, CUR, PE+CUR) at 34 °C. The color scale is indicated in each figure and shows the isoparametric values.

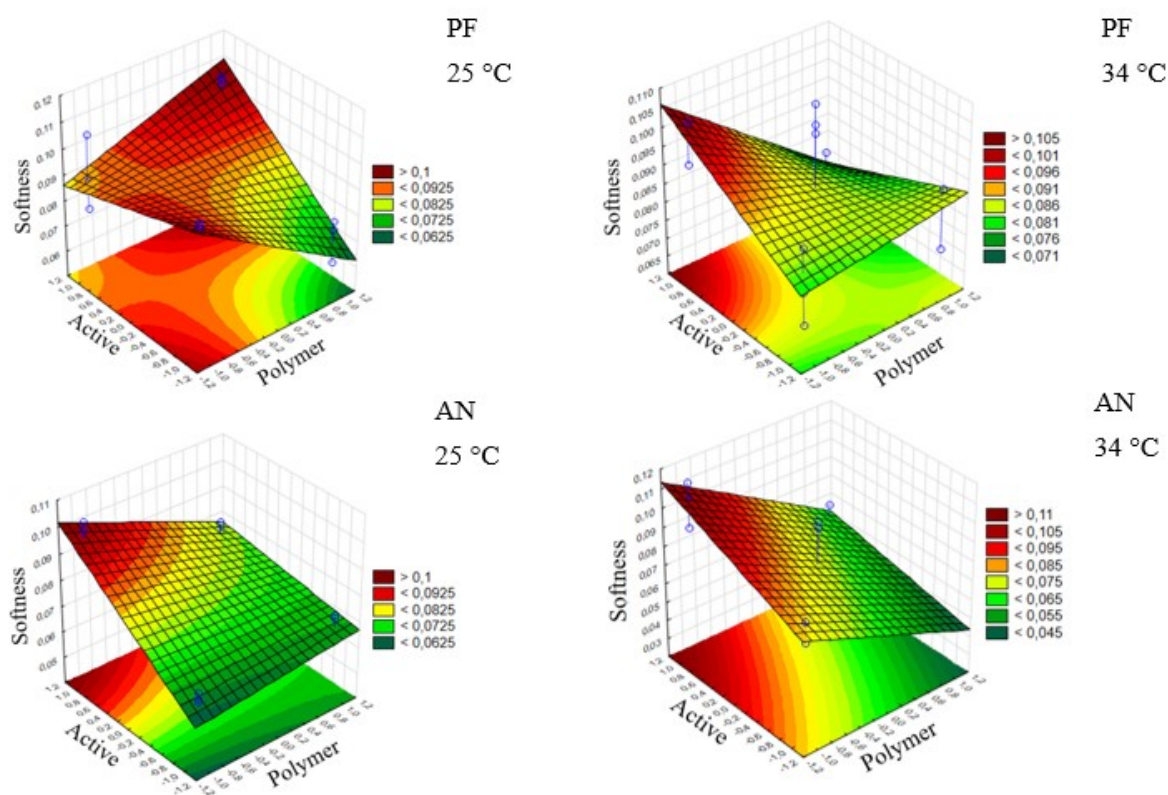

**Figure S6.** Response surface plots of softness as a function of different polymers (C934P, C974P, PC), different type of bioactive (PE, CUR, PE+CUR) and vegetable oils (PF or AN) for emulgels systems, at 25 and 34 °C. The color scale is indicated in each figure and shows the isoparametric values.

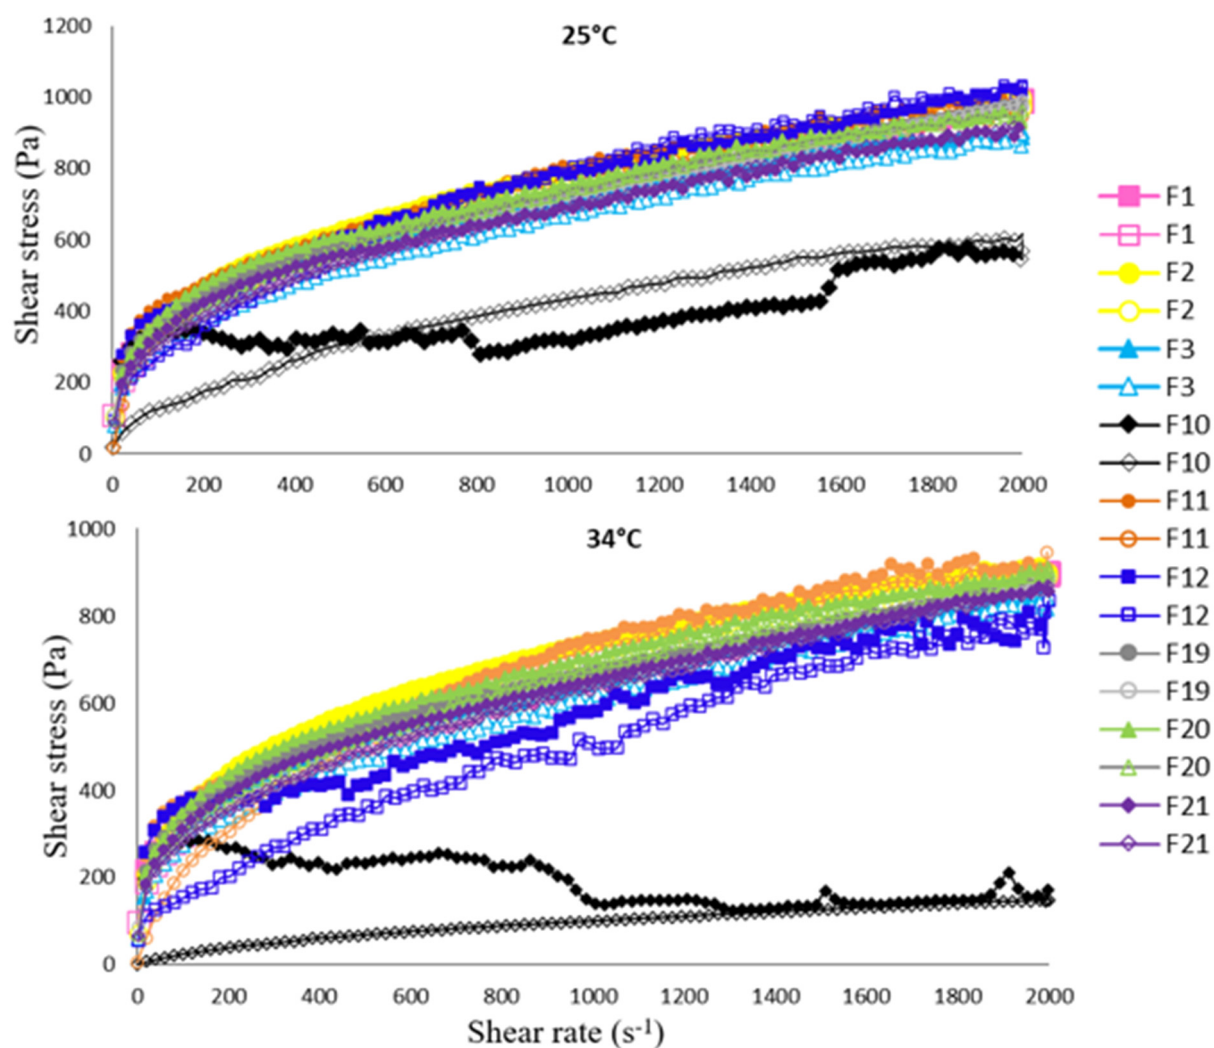

**Figure S7.** Flow curves of the formulations containing PF at different temperatures. Closed symbol represents the up-curve and open symbol represents the downcurve. Standard deviations have been omitted for clarity; however, in all cases, the relative standard deviation of replicate analysis was less than 10%.

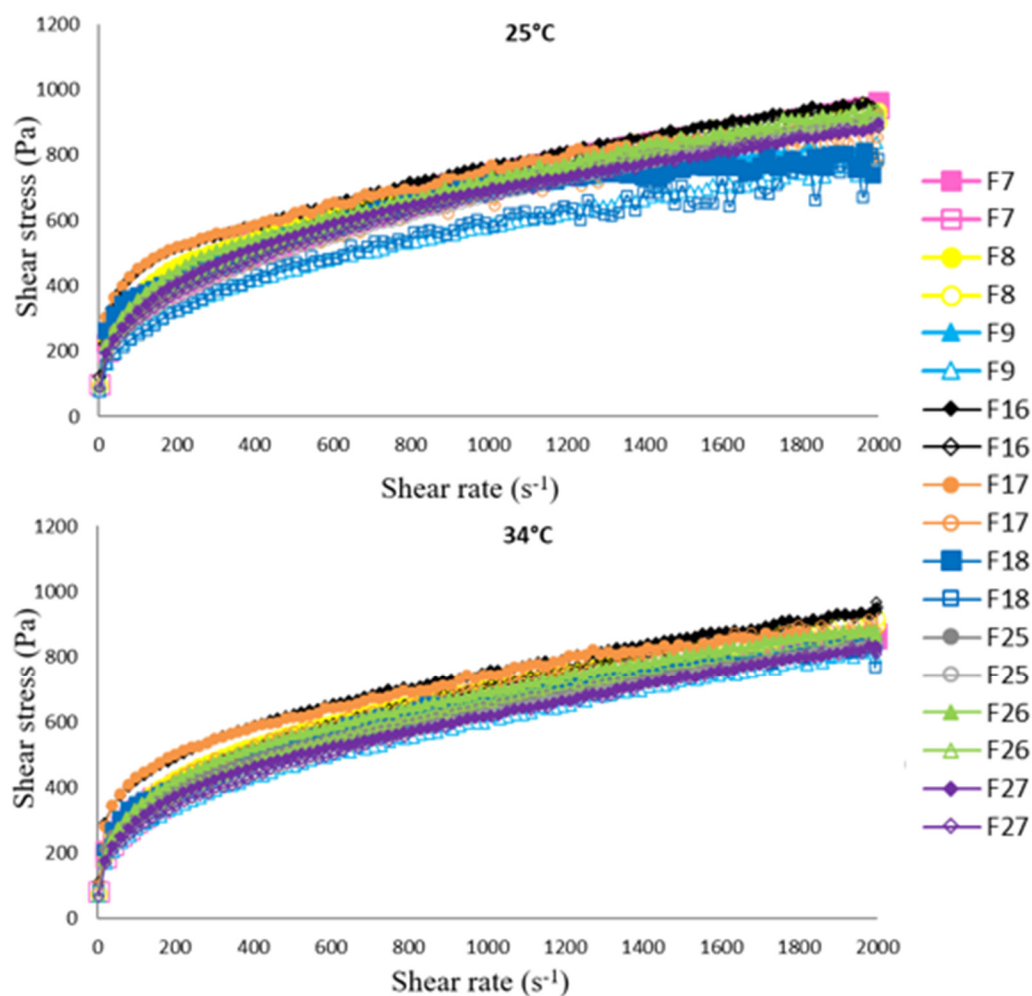

**Figure S8.** Flow curves of the formulations containing AN at different temperatures. Closed symbol represents the up-curve and open symbol represents the downcurve. Standard deviations have been omitted for clarity; however, in all cases, the relative standard deviation of replicate analysis was less than 10%.

**Table S2.** Relative standard deviation (%) of emulgels systems F1, F2 and F3, containing PF and PE: elastic modulus ( $G'$ ) and viscous modulus ( $G''$ ) at 25 and 34 °C.

| Relative standard deviation (%) |       |       |       |       |       |       |       |       |       |       |       |       |
|---------------------------------|-------|-------|-------|-------|-------|-------|-------|-------|-------|-------|-------|-------|
| Frequency (Hz)                  | F1    |       |       |       | F2    |       |       |       | F3    |       |       |       |
|                                 | 25 °C |       | 34 °C |       | 25 °C |       | 34 °C |       | 25 °C |       | 34 °C |       |
|                                 | $G'$  | $G''$ |
| 0.10                            | 6.84  | 6.93  | 6.10  | 5.57  | 8.72  | 9.37  | 4.32  | 7.44  | 1.44  | 6.94  | 4.79  | 3.82  |
| 0.15                            | 5.73  | 7.55  | 1.93  | 3.02  | 5.00  | 3.74  | 1.19  | 5.67  | 2.12  | 2.33  | 1.88  | 9.37  |
| 0.22                            | 5.14  | 6.43  | 1.58  | 2.79  | 4.09  | 7.12  | 1.66  | 9.14  | 2.91  | 4.47  | 3.89  | 2.93  |
| 0.32                            | 1.73  | 8.24  | 1.92  | 7.75  | 3.88  | 9.07  | 1.93  | 4.05  | 3.45  | 6.02  | 3.73  | 8.39  |
| 0.46                            | 2.39  | 9.97  | 2.07  | 1.07  | 4.16  | 8.20  | 2.24  | 1.57  | 3.74  | 8.31  | 0.49  | 7.15  |
| 0.68                            | 2.13  | 7.87  | 2.04  | 7.02  | 4.86  | 6.87  | 2.33  | 3.03  | 3.87  | 8.44  | 3.28  | 4.11  |
| 1.00                            | 1.70  | 5.71  | 2.13  | 5.86  | 5.03  | 8.84  | 2.41  | 1.72  | 3.78  | 7.93  | 0.60  | 8.90  |
| 1.47                            | 1.91  | 8.39  | 2.19  | 4.71  | 4.93  | 3.99  | 2.31  | 2.55  | 3.79  | 7.37  | 7.74  | 3.57  |
| 2.15                            | 1.24  | 3.26  | 2.19  | 4.42  | 5.69  | 3.95  | 2.20  | 1.10  | 3.70  | 6.74  | 9.74  | 8.71  |
| 3.16                            | 2.05  | 4.05  | 2.07  | 2.20  | 4.89  | 3.03  | 2.16  | 0.17  | 3.58  | 5.77  | 8.64  | 8.40  |
| 4.64                            | 1.37  | 4.27  | 1.99  | 2.35  | 4.90  | 4.84  | 2.17  | 1.29  | 3.46  | 4.59  | 6.16  | 9.97  |
| 6.81                            | 0.56  | 3.80  | 1.86  | 2.03  | 4.46  | 1.10  | 1.93  | 2.18  | 3.14  | 4.15  | 5.37  | 3.12  |
| 10.00                           | 1.53  | 5.02  | 1.90  | 0.86  | 4.50  | 6.24  | 1.44  | 1.59  | 2.59  | 2.55  | 8.58  | 5.35  |

**Table S3.** Relative standard deviation (%) of emulgels systems F7, F8 and F9, containing AN and PE: elastic modulus (G') and viscous modulus (G'') at 25 and 34 °C.

| Relative standard deviation (%) |       |      |       |      |       |      |       |      |       |      |       |      |
|---------------------------------|-------|------|-------|------|-------|------|-------|------|-------|------|-------|------|
| Frequency (Hz)                  | F7    |      |       |      | F8    |      |       |      | F9    |      |       |      |
|                                 | 25 °C |      | 34 °C |      | 25 °C |      | 34 °C |      | 25 °C |      | 34 °C |      |
|                                 | G'    | G''  |
| 0.10                            | 0.75  | 7.45 | 4.01  | 1.94 | 6.12  | 5.79 | 3.36  | 5.23 | 8.63  | 5.46 | 7.84  | 3.78 |
| 0.15                            | 1.38  | 1.05 | 6.75  | 5.25 | 1.71  | 3.62 | 4.33  | 3.97 | 6.39  | 6.53 | 7.71  | 3.50 |
| 0.22                            | 1.86  | 8.86 | 9.82  | 4.40 | 2.48  | 3.28 | 3.87  | 1.97 | 8.38  | 7.52 | 7.82  | 7.09 |
| 0.32                            | 2.20  | 3.15 | 6.28  | 8.75 | 6.18  | 6.94 | 3.79  | 2.54 | 2.34  | 9.76 | 7.88  | 5.42 |
| 0.46                            | 2.31  | 5.33 | 6.02  | 1.82 | 7.95  | 5.44 | 3.89  | 0.80 | 3.42  | 4.42 | 7.96  | 4.45 |
| 0.68                            | 2.49  | 9.54 | 2.08  | 6.09 | 5.68  | 4.84 | 3.87  | 6.54 | 4.31  | 4.15 | 8.00  | 0.72 |
| 1.00                            | 2.63  | 8.88 | 4.37  | 8.01 | 4.37  | 9.91 | 3.76  | 3.01 | 3.77  | 8.81 | 7.82  | 0.17 |
| 1.47                            | 2.70  | 7.83 | 6.71  | 8.03 | 4.98  | 9.84 | 3.73  | 9.81 | 5.01  | 0.95 | 7.70  | 1.01 |
| 2.15                            | 2.79  | 7.17 | 6.71  | 6.59 | 4.00  | 8.19 | 3.89  | 8.60 | 2.15  | 9.57 | 7.58  | 0.87 |
| 3.16                            | 2.79  | 6.34 | 6.67  | 8.32 | 6.59  | 2.46 | 3.87  | 8.76 | 5.10  | 3.84 | 7.44  | 2.36 |
| 4.64                            | 2.74  | 4.89 | 6.29  | 7.04 | 3.36  | 6.00 | 3.90  | 6.51 | 5.26  | 3.21 | 7.17  | 2.86 |
| 6.81                            | 2.63  | 4.61 | 5.92  | 7.31 | 4.97  | 3.38 | 3.88  | 8.01 | 3.89  | 1.18 | 6.86  | 3.06 |
| 10.00                           | 2.17  | 3.33 | 4.94  | 2.43 | 1.51  | 8.67 | 3.36  | 2.40 | 0.84  | 8.86 | 6.27  | 6.23 |

**Table S4.** Relative standard deviation (%) of emulgels systems F10, F11 and F12, containing PF and CUR: elastic modulus (G') and viscous modulus (G'') at 25 and 34 °C.

| Relative standard deviation (%) |       |      |       |      |       |      |       |      |       |      |       |      |
|---------------------------------|-------|------|-------|------|-------|------|-------|------|-------|------|-------|------|
| Frequency (Hz)                  | F10   |      |       |      | F11   |      |       |      | F12   |      |       |      |
|                                 | 25 °C |      | 34 °C |      | 25 °C |      | 34 °C |      | 25 °C |      | 34 °C |      |
|                                 | G'    | G''  |
| 0.10                            | 0.85  | 1.17 | 8.40  | 5.99 | 1.35  | 2.75 | 6.04  | 6.30 | 1.68  | 5.75 | 8.46  | 2.43 |
| 0.15                            | 1.89  | 9.18 | 5.75  | 4.97 | 1.39  | 2.70 | 0.09  | 6.33 | 0.48  | 0.33 | 9.73  | 8.22 |
| 0.22                            | 4.91  | 5.70 | 7.98  | 7.37 | 1.36  | 2.67 | 4.84  | 5.67 | 1.11  | 1.89 | 9.23  | 8.42 |
| 0.32                            | 9.48  | 5.54 | 4.99  | 4.95 | 1.36  | 2.48 | 0.00  | 6.07 | 0.93  | 3.98 | 9.41  | 6.01 |
| 0.46                            | 8.72  | 5.56 | 3.08  | 3.34 | 1.38  | 2.44 | 0.72  | 5.23 | 0.16  | 9.79 | 9.55  | 7.90 |
| 0.68                            | 8.00  | 4.94 | 1.74  | 4.76 | 1.47  | 2.42 | 1.21  | 0.99 | 0.74  | 9.03 | 9.59  | 6.56 |
| 1.00                            | 7.40  | 4.20 | 0.65  | 5.68 | 1.45  | 2.08 | 1.48  | 9.27 | 0.77  | 3.55 | 9.59  | 6.16 |
| 1.47                            | 6.79  | 8.98 | 1.94  | 2.64 | 0.45  | 2.30 | 1.52  | 9.24 | 0.15  | 4.77 | 9.64  | 7.87 |
| 2.15                            | 6.29  | 7.95 | 4.30  | 4.29 | 1.46  | 2.23 | 2.17  | 1.05 | 1.23  | 4.81 | 9.78  | 8.62 |
| 3.16                            | 5.97  | 7.39 | 5.42  | 2.99 | 1.50  | 2.40 | 2.12  | 9.68 | 0.66  | 9.14 | 9.34  | 6.25 |
| 4.64                            | 5.34  | 5.80 | 6.00  | 8.91 | 1.47  | 2.44 | 1.74  | 2.53 | 0.22  | 9.20 | 9.26  | 7.13 |
| 6.81                            | 5.18  | 7.55 | 7.51  | 6.10 | 1.36  | 3.71 | 1.79  | 0.43 | 0.14  | 1.48 | 9.86  | 7.80 |
| 10.00                           | 4.87  | 1.47 | 7.47  | 2.62 | 1.25  | 2.09 | 1.94  | 7.64 | 8.29  | 9.26 | 8.39  | 9.94 |

**Table S5.** Relative standard deviation (%) of emulgels systems F16, F17 and F18, containing AN and CUR: elastic modulus (G') and viscous modulus (G'') at 25 and 34 °C.

| Relative standard deviation (%) |       |      |       |      |       |      |       |      |       |      |       |      |
|---------------------------------|-------|------|-------|------|-------|------|-------|------|-------|------|-------|------|
| Frequency (Hz)                  | F16   |      |       |      | F17   |      |       |      | F18   |      |       |      |
|                                 | 25 °C |      | 34 °C |      | 25 °C |      | 34 °C |      | 25 °C |      | 34 °C |      |
|                                 | G'    | G''  |
| 0.10                            | 8.62  | 9.71 | 4.49  | 9.88 | 2.42  | 8.82 | 5.22  | 9.78 | 8.23  | 8.78 | 2.83  | 7.22 |
| 0.15                            | 6.11  | 8.76 | 2.36  | 9.92 | 9.43  | 7.14 | 4.71  | 9.96 | 9.82  | 8.70 | 3.21  | 4.31 |
| 0.22                            | 5.55  | 9.34 | 2.41  | 6.58 | 5.98  | 9.02 | 4.65  | 9.00 | 8.71  | 8.30 | 3.23  | 5.66 |
| 0.32                            | 2.51  | 8.63 | 2.85  | 3.96 | 2.39  | 9.59 | 4.74  | 7.44 | 0.36  | 8.22 | 3.17  | 4.21 |
| 0.46                            | 2.29  | 3.82 | 2.64  | 2.57 | 2.39  | 6.94 | 4.84  | 7.04 | 6.10  | 9.21 | 3.06  | 2.89 |
| 0.68                            | 3.99  | 4.86 | 2.58  | 2.75 | 2.99  | 9.16 | 4.90  | 6.45 | 4.82  | 8.98 | 2.98  | 4.30 |
| 1.00                            | 4.85  | 1.55 | 2.63  | 2.34 | 2.39  | 4.46 | 4.81  | 5.98 | 0.26  | 4.05 | 2.95  | 3.99 |
| 1.47                            | 2.94  | 2.53 | 2.61  | 1.74 | 3.87  | 1.66 | 4.84  | 5.06 | 2.23  | 7.73 | 2.90  | 3.58 |
| 2.15                            | 1.49  | 0.98 | 2.57  | 3.43 | 2.78  | 8.17 | 4.89  | 6.26 | 2.05  | 9.04 | 2.80  | 3.52 |
| 3.16                            | 3.10  | 3.18 | 2.95  | 2.76 | 3.71  | 8.07 | 4.80  | 5.43 | 1.15  | 9.64 | 2.91  | 2.29 |
| 4.64                            | 2.99  | 5.52 | 2.64  | 3.05 | 3.99  | 4.03 | 4.80  | 4.51 | 1.70  | 6.59 | 2.74  | 2.56 |
| 6.81                            | 3.39  | 5.19 | 2.68  | 1.70 | 3.71  | 4.37 | 4.62  | 6.07 | 1.57  | 9.38 | 2.69  | 2.85 |
| 10.00                           | 1.57  | 4.44 | 2.49  | 1.53 | 4.49  | 9.57 | 4.14  | 8.00 | 4.48  | 9.02 | 2.37  | 6.29 |

**Table S6.** Relative standard deviation (%) of emulgels systems F19, F20 and F21, containing PF and PE + CUR: elastic modulus (G') and viscous modulus (G'') at 25 and 34 °C.

| Relative standard deviation (%) |       |      |       |      |       |      |       |      |       |      |       |      |
|---------------------------------|-------|------|-------|------|-------|------|-------|------|-------|------|-------|------|
| Frequency (Hz)                  | F19   |      |       |      | F20   |      |       |      | F21   |      |       |      |
|                                 | 25 °C |      | 34 °C |      | 25 °C |      | 34 °C |      | 25 °C |      | 34 °C |      |
|                                 | G'    | G''  |
| 0.10                            | 1.02  | 0.01 | 7.13  | 9.93 | 9.66  | 9.34 | 2.10  | 9.36 | 9.16  | 9.48 | 1.90  | 9.79 |
| 0.15                            | 7.53  | 0.02 | 3.86  | 3.91 | 4.39  | 5.38 | 3.51  | 9.13 | 9.63  | 9.12 | 2.12  | 9.51 |
| 0.22                            | 9.64  | 0.03 | 3.55  | 0.67 | 7.87  | 7.59 | 3.83  | 6.34 | 2.53  | 9.50 | 3.46  | 8.93 |
| 0.32                            | 8.46  | 0.05 | 3.34  | 2.09 | 7.10  | 9.67 | 3.72  | 6.81 | 3.29  | 9.86 | 4.18  | 8.12 |
| 0.46                            | 9.55  | 0.01 | 3.33  | 2.73 | 9.80  | 5.32 | 3.59  | 6.86 | 5.41  | 9.88 | 4.02  | 8.55 |
| 0.68                            | 9.65  | 0.05 | 3.26  | 1.85 | 6.31  | 9.45 | 3.73  | 6.31 | 5.52  | 9.31 | 3.87  | 8.18 |
| 1.00                            | 9.26  | 0.01 | 3.23  | 2.02 | 5.99  | 9.63 | 3.61  | 4.46 | 4.31  | 8.70 | 3.41  | 9.58 |
| 1.47                            | 7.17  | 0.03 | 3.23  | 1.74 | 4.14  | 9.88 | 3.59  | 2.51 | 4.07  | 8.46 | 3.23  | 7.79 |
| 2.15                            | 5.82  | 0.04 | 3.22  | 1.98 | 4.15  | 5.65 | 3.61  | 9.63 | 3.81  | 8.42 | 2.86  | 5.28 |
| 3.16                            | 5.38  | 0.01 | 3.15  | 2.18 | 5.29  | 4.89 | 3.53  | 8.28 | 2.89  | 6.91 | 2.51  | 4.30 |
| 4.64                            | 5.82  | 0.02 | 3.08  | 1.14 | 4.89  | 8.84 | 3.50  | 5.52 | 4.19  | 9.94 | 2.38  | 2.08 |
| 6.81                            | 3.40  | 0.06 | 2.98  | 1.56 | 3.09  | 2.61 | 3.49  | 4.02 | 5.18  | 9.82 | 2.08  | 0.56 |
| 10.00                           | 4.68  | 0.19 | 2.82  | 3.71 | 5.30  | 3.93 | 3.35  | 5.49 | 2.76  | 9.00 | 1.98  | 2.48 |



**Table S7.** Relative standard deviation (%) of emulgels systems F25, F26 and F27, containing PF and PE + CUR: elastic modulus ( $G'$ ) and viscous modulus ( $G''$ ) at 25 and 34 °C.

| Relative standard deviation (%) |       |       |       |       |       |       |       |       |       |       |       |       |
|---------------------------------|-------|-------|-------|-------|-------|-------|-------|-------|-------|-------|-------|-------|
| Frequency (Hz)                  | F25   |       |       |       | F26   |       |       |       | F27   |       |       |       |
|                                 | 25 °C |       | 34 °C |       | 25 °C |       | 34 °C |       | 25 °C |       | 34 °C |       |
|                                 | $G'$  | $G''$ |
| 0.10                            | 8.18  | 5.62  | 5.05  | 9.64  | 9.44  | 6.06  | 7.17  | 8.68  | 9.46  | 9.83  | 5.16  | 3.43  |
| 0.15                            | 9.39  | 9.31  | 5.10  | 8.39  | 9.97  | 7.64  | 7.96  | 8.80  | 7.69  | 9.73  | 5.30  | 8.89  |
| 0.22                            | 4.89  | 9.75  | 5.34  | 6.44  | 4.04  | 9.11  | 6.44  | 9.63  | 8.50  | 4.77  | 5.37  | 3.35  |
| 0.32                            | 0.67  | 8.57  | 5.52  | 5.52  | 1.84  | 9.00  | 5.42  | 6.22  | 4.68  | 5.19  | 4.26  | 6.11  |
| 0.46                            | 3.97  | 5.24  | 5.74  | 4.14  | 1.37  | 8.13  | 4.84  | 1.43  | 6.62  | 2.46  | 4.89  | 7.12  |
| 0.68                            | 0.13  | 6.78  | 5.78  | 5.15  | 2.33  | 8.37  | 4.11  | 6.46  | 3.03  | 4.89  | 4.43  | 8.40  |
| 1.00                            | 1.31  | 3.31  | 5.76  | 4.86  | 2.35  | 8.41  | 3.89  | 6.28  | 1.98  | 9.91  | 4.13  | 7.54  |
| 1.47                            | 1.14  | 1.59  | 5.77  | 5.37  | 1.89  | 7.64  | 3.49  | 0.87  | 3.57  | 9.55  | 3.93  | 6.23  |
| 2.15                            | 2.39  | 8.59  | 5.72  | 5.35  | 2.76  | 6.06  | 3.38  | 1.76  | 2.24  | 8.74  | 3.67  | 5.46  |
| 3.16                            | 1.34  | 9.47  | 5.61  | 5.90  | 1.64  | 4.37  | 3.36  | 2.45  | 2.60  | 3.19  | 3.43  | 4.15  |
| 4.64                            | 1.55  | 7.75  | 5.42  | 4.97  | 2.29  | 4.90  | 3.15  | 2.59  | 9.58  | 8.03  | 3.19  | 4.06  |
| 6.81                            | 1.52  | 4.30  | 4.90  | 5.67  | 2.08  | 9.29  | 2.96  | 3.06  | 2.83  | 7.17  | 2.95  | 5.19  |
| 10.00                           | 1.50  | 3.64  | 4.37  | 5.61  | 2.80  | 9.68  | 2.57  | 4.68  | 2.51  | 4.76  | 2.37  | 3.80  |

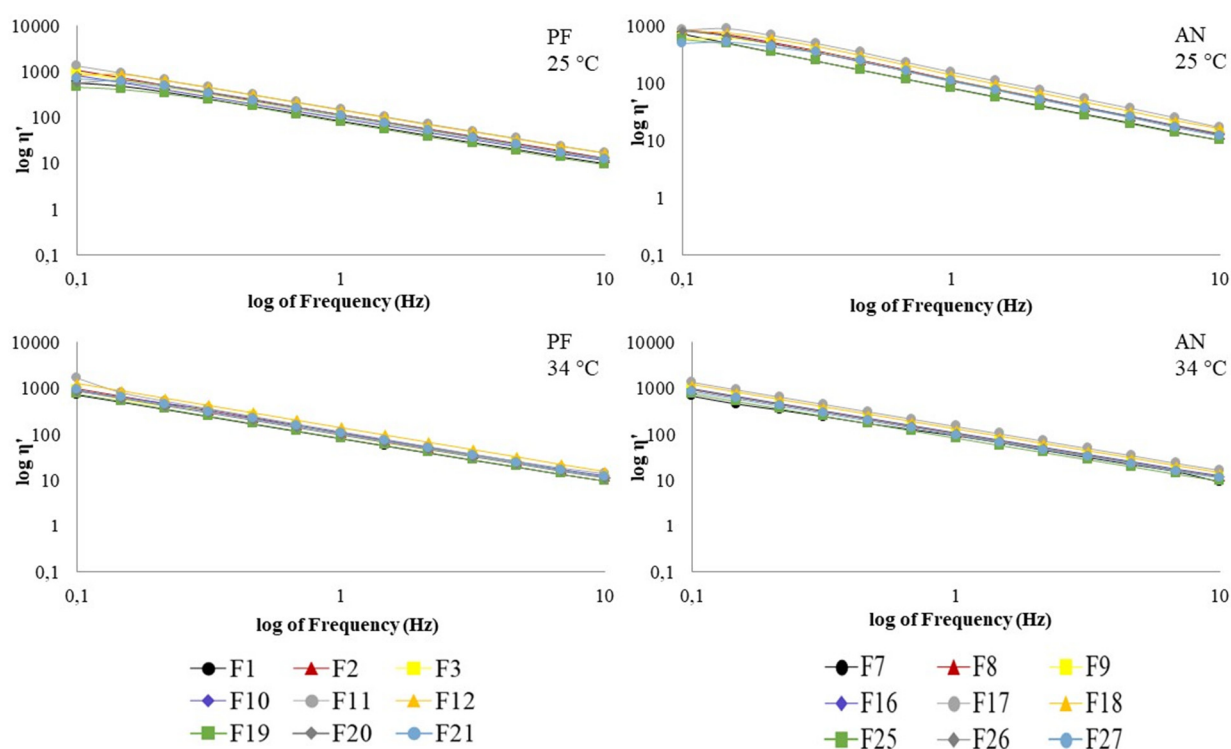

**Figure S9.** Viscosity  $\eta$  as a function of frequency of formulations without PF and AN oil at temperatures 25 and 34 °C. Each point is the mean of at least three replicates. Standard deviations have been omitted for clarity; however, in all cases, the relative standard deviation of replicate analysis was less than 10%.

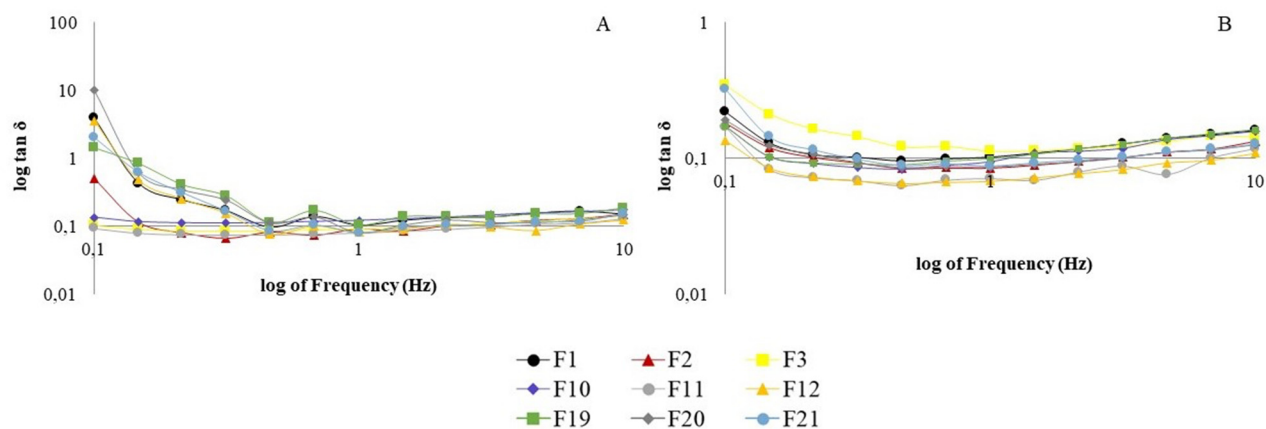

**Figure S10.**  $\tan \delta$  as a function of frequency of formulations containing PF at temperatures of 25 (A) and 34 °C (B). Each point is the mean of at least three replicates. Standard deviations have been omitted for clarity; however, in all cases, the relative standard deviation of replicate analysis was less than 10%.

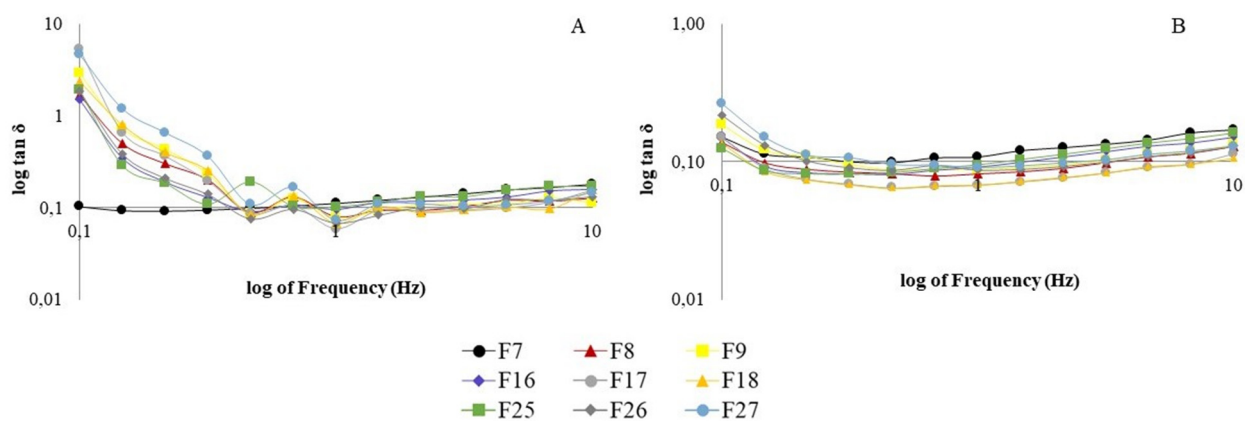

**Figure S11.**  $\tan \delta$  as a function of frequency of formulations containing AN at temperatures of 25 (A) and 34 °C (B). Each point is the mean of at least three replicates. Standard deviations have been omitted for clarity; however, in all cases, the relative standard deviation of replicate analysis was less than 10%.
